# Supplementary material
Source: publisher figshare collection journal article supplement (https://aacr.figshare.com/articles/dataset/_/22820150)
Supplement: Supplementary file 1 [file 40570307]

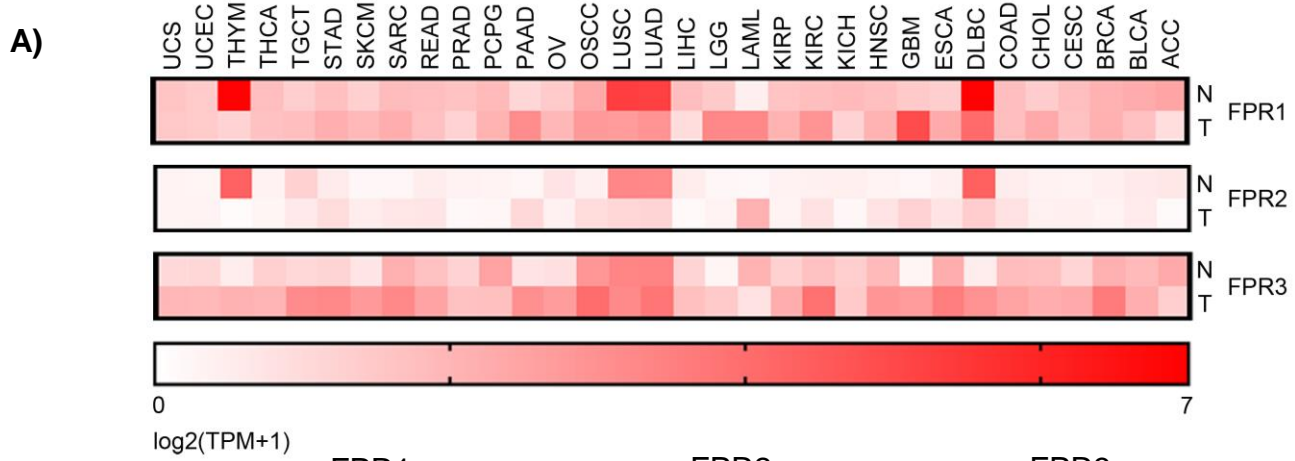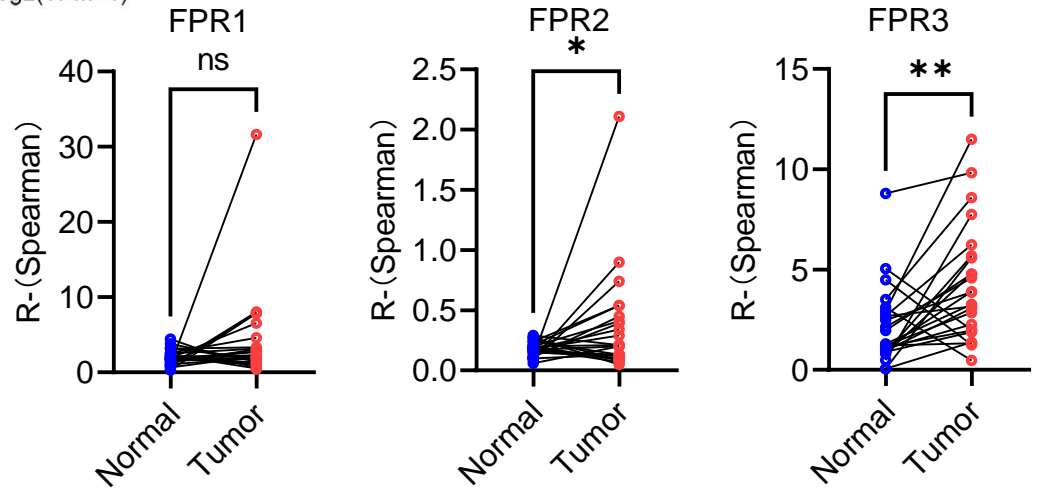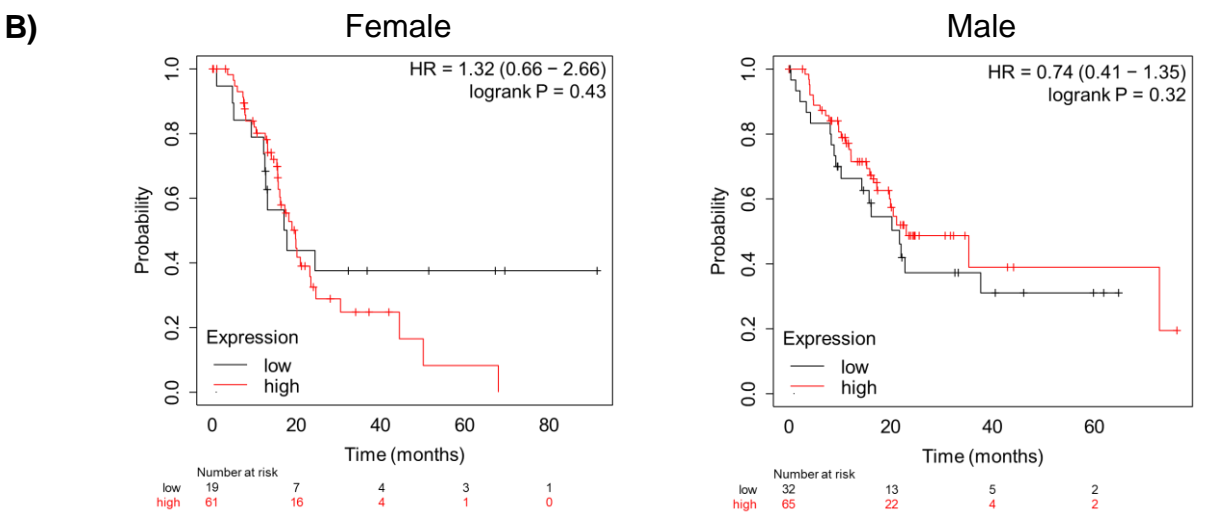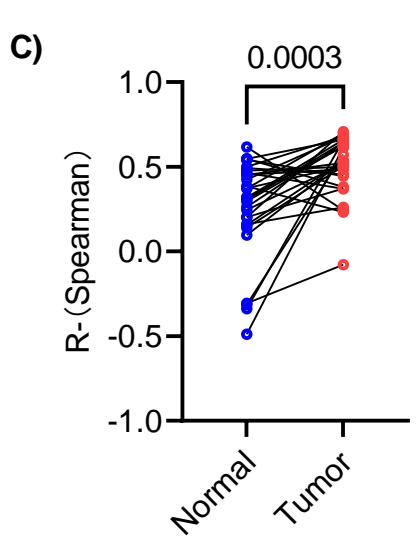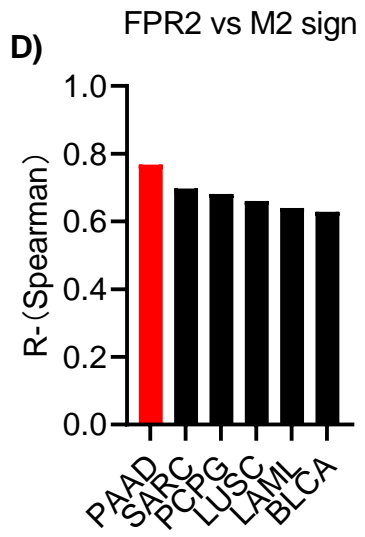

**Supplementary Figure 1. FPRs correlate with pro-cancer macrophage signatures**

**A)** Heatmap visualization and paired comparison of the gene expression levels of FPR1, FPR2, and FPR3 in different cancer tissues (T) and the matched normal tissues (N) in the TCGA datasets. Data are shown as  $\log_2(\text{TPM}+1)$ . **B)** Kaplan–Meier survival curves comparing FPR3 low and high mRNA expression levels total PAAD cohort, in female, and male patients, respectively. Survival curves based on overall survival (OS) are shown. **C)** Overall comparison of Spearman’s rank correlation coefficients for FPR2 with M2 macrophage signature for a total of 30 types of tumors and normal tissues from TCGA datasets. Wilcoxon tests were performed. **D)** Results of Spearman’s rank correlation analyses of FPR2 with M2 macrophage signature genes using TCGA datasets plotted with coefficient R and  $-\log_{10}(\text{P-value})$ . The six most significant tumor types are shown.

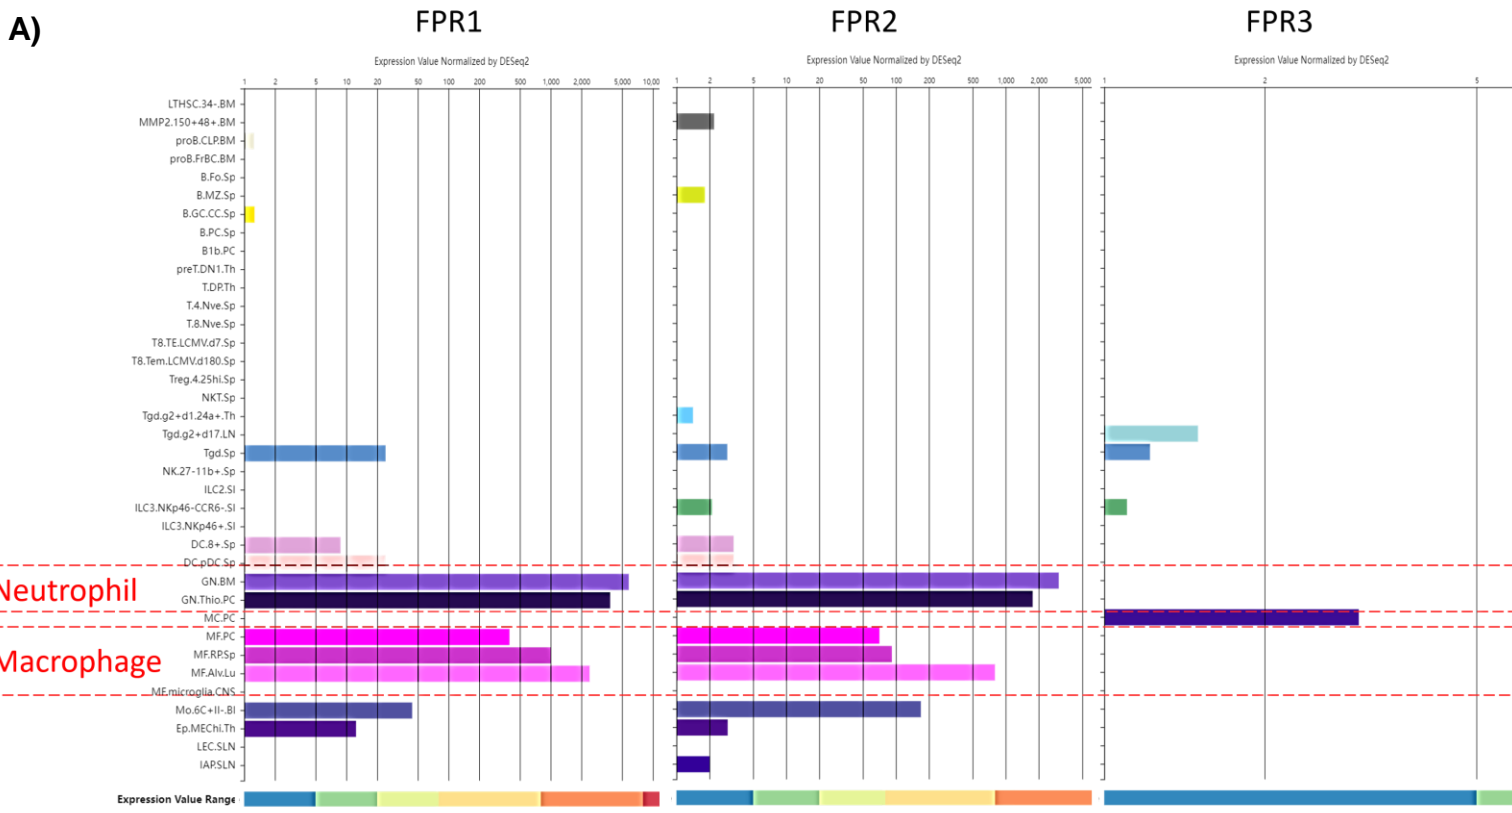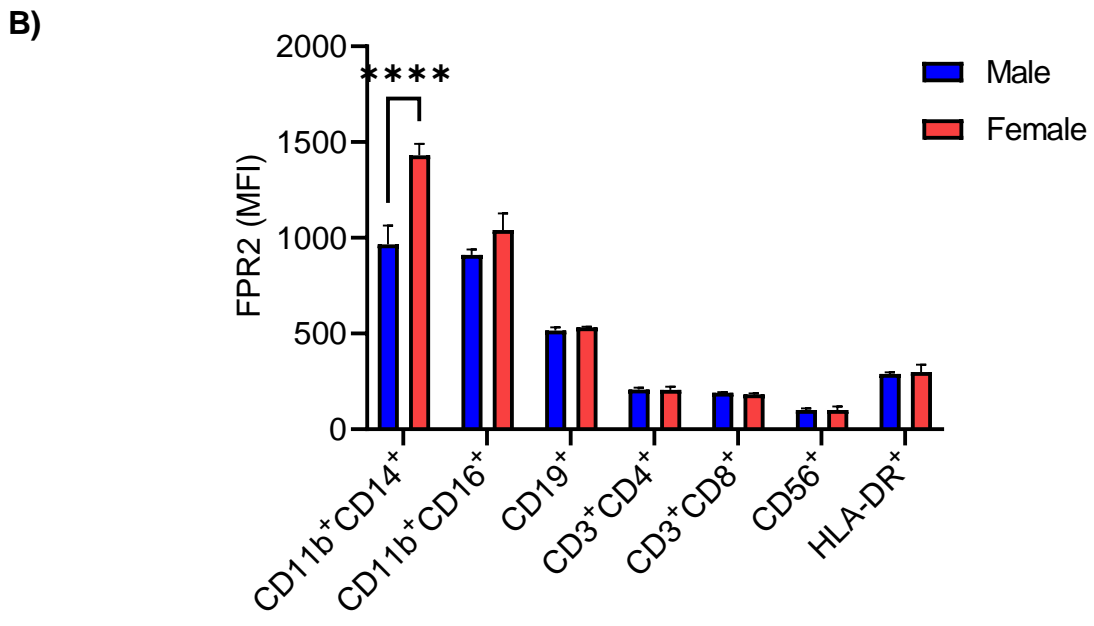

**Supplementary Figure 2. Human gene and protein expression in different immune cell types**

**A)** FPR1 (205118\_at), FPR2 (210773\_at), and FPR3 (214560\_at) mRNA expression levels in Primary Cell Atlas in BioGPS Dataset website. Data is publicly available from BioGPS portal. **B)** FPR2 expression (MFI) in human peripheral blood mononuclear cells analyzed by flow cytometry (n=2). Data is shown as mean±SEM.

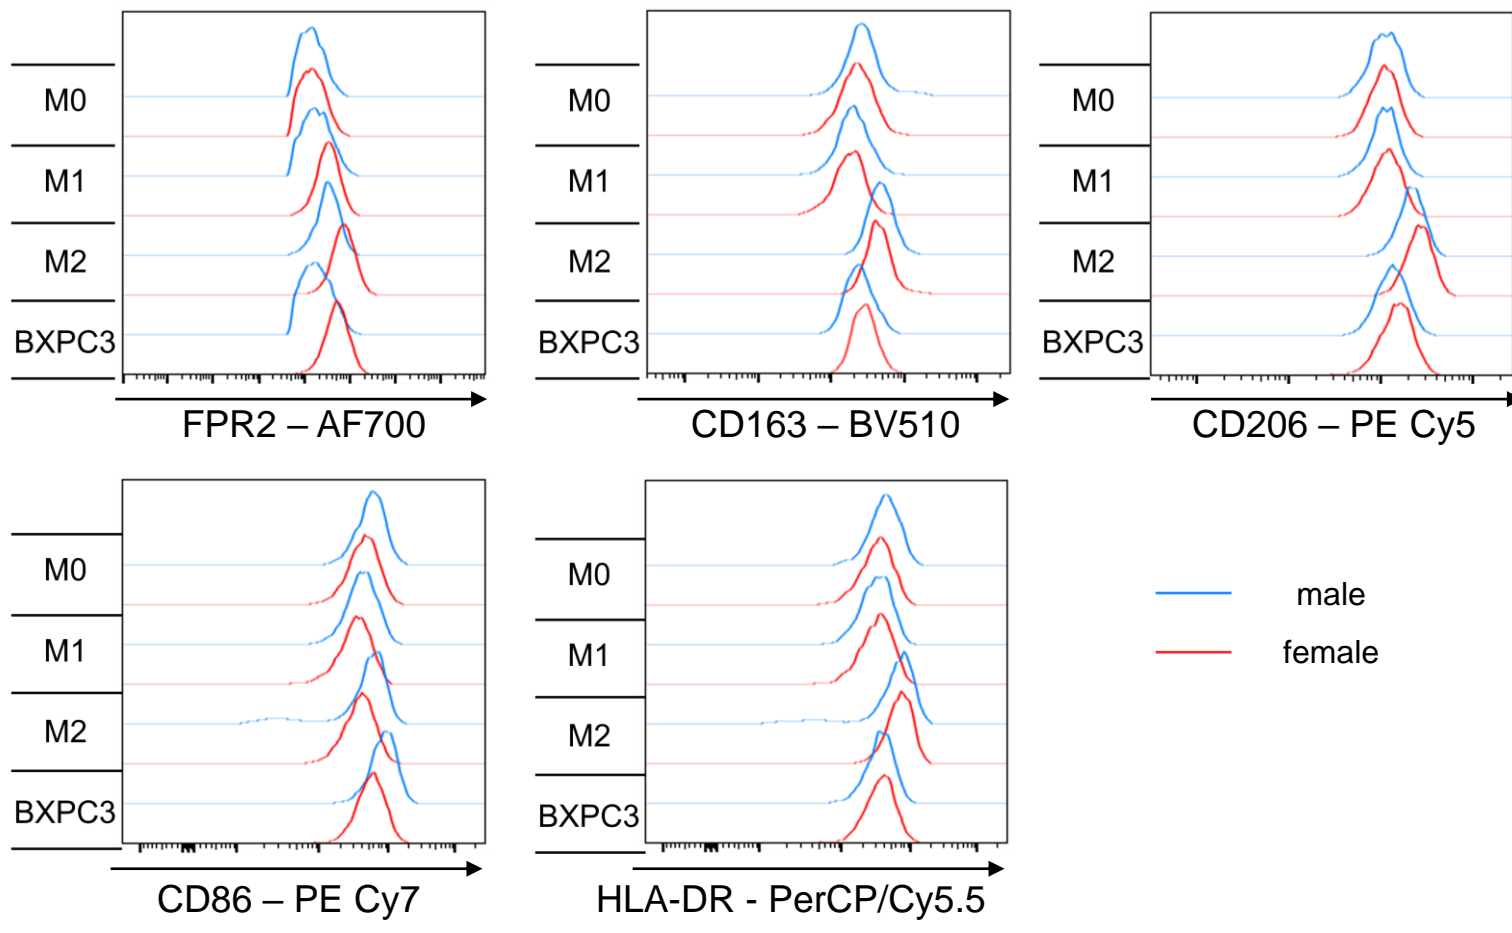

**Supplementary Figure 3. FPR2 is differentially expressed in macrophages of different sexes**

Representative flow cytometry histogram of FPR2 and classical macrophage markers are shown. M0, M1, M2 and tumor conditional macrophages (BxPC3) were compared sequentially, male vs. female.

A)

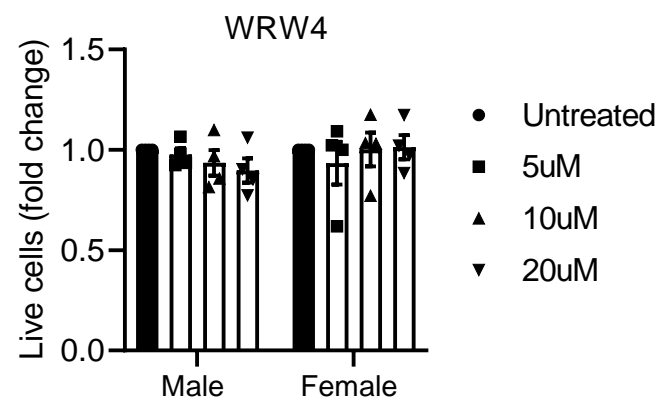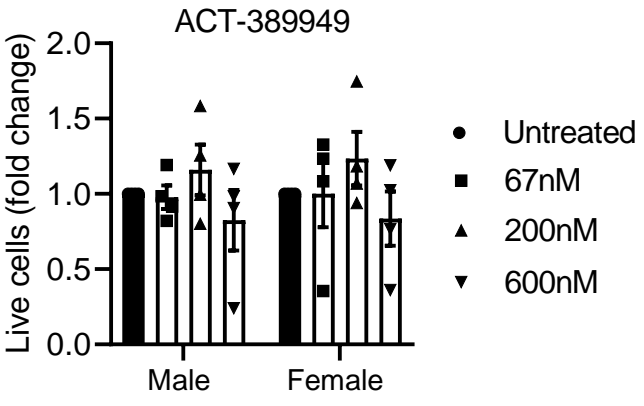

B)

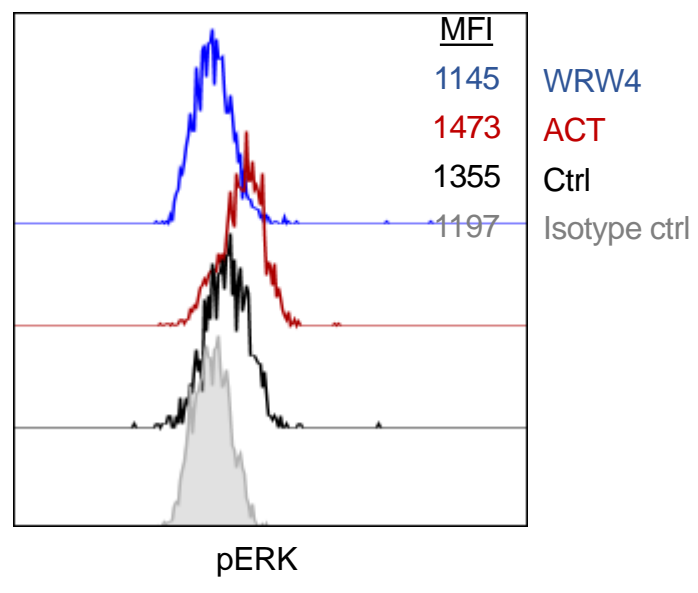

C)

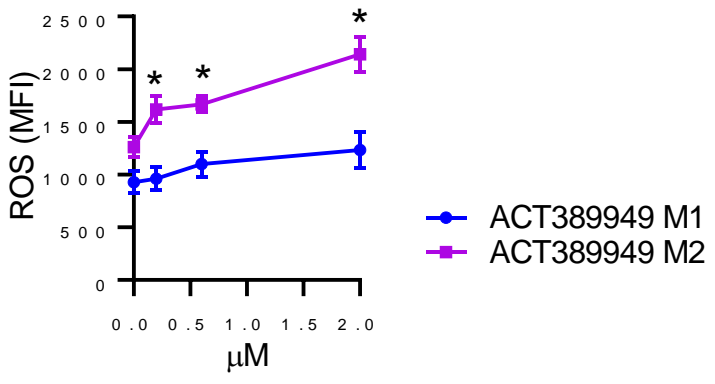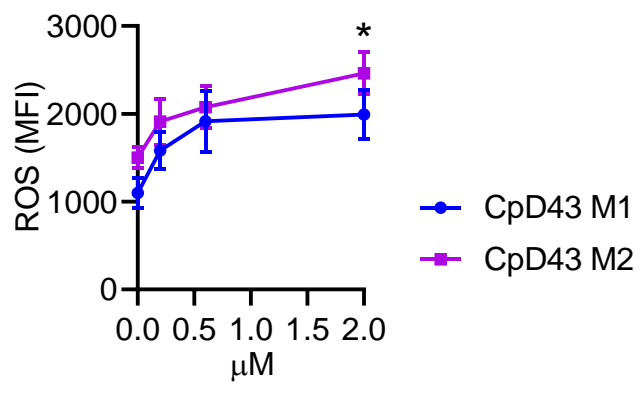

**Supplementary Figure 4. Pharmacological targeting of FPR2**

**A)** Percentage of live cells after 72-hour incubation of induced macrophages with 0-600 nM FPR2 agonist (ACT-389949) or 0-20 $\mu$ M antagonist (WRW4) and assessed for viability. **B)** A representative histogram (n=4) of pERK expression in M2 macrophages cultured with the indicated treatments. **C)** ROS production in macrophages treated with FPR2 agonists (ACT-389949 or CpD43). M1 and M2 macrophages were induced from the same HD-derived macrophages, and treated with different concentration gradients of FPR2 agonists, respectively. (n=4 HD/group; \*p < 0.05)





**Supplementary Figure 5. Proteomics of macrophages targeted by FPR2 agonist ACT-389949**

**A-B)** Venn Diagram of the unique proteins identified and their corresponding protein abundances in M2 with and without ACT treatment. **C-E)** Fold change comparison of proteins with abundances between males and females and within the same sex. Fold change of 2 and above was used for comparison. **F-G)** Unique proteins identified and their corresponding protein abundances in TCM (BxCP3 and CFPAC). **H-J)** FunRich quantitative gene ontology in cellular compartment comparing females to males with or without ACT treatment, alternatively, TCM. **K)** Quantitative gene ontology analysis of biological processes, **L)** biological pathways, and **M)** transcription factors. Accumulative data of all proteins are shown (n=4 biological replicates each condition and sex) with  $FDR \leq 0.01$  confidence, are master proteins and present in two out of three technical replicates.

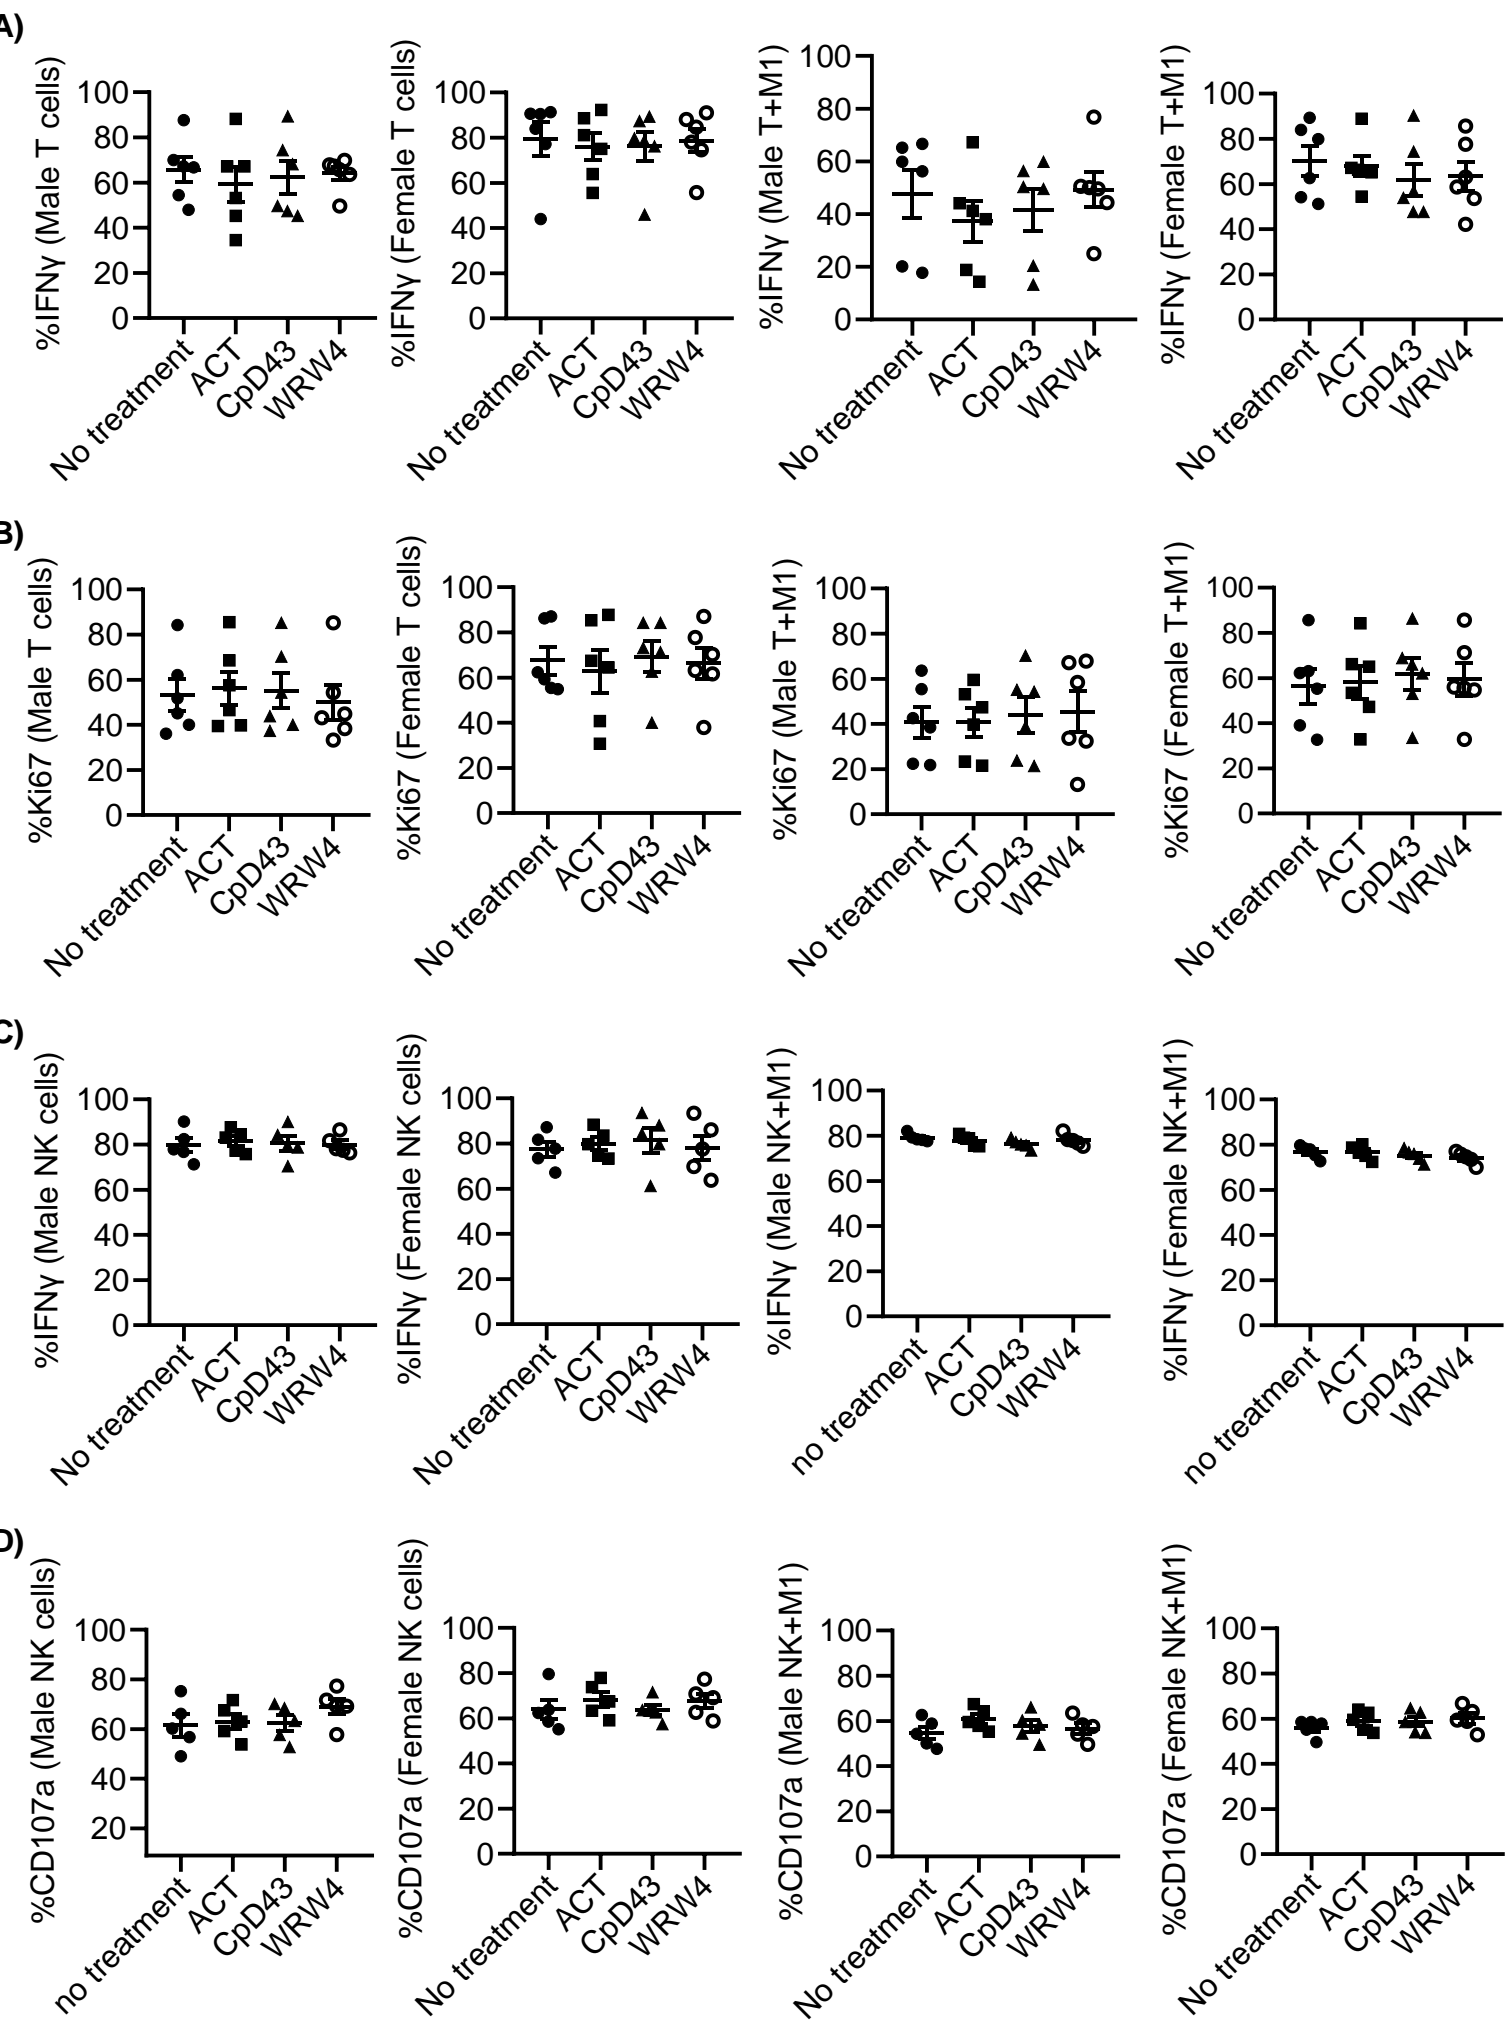

**Supplementary Figure 6. FPR2 agonist and antagonist had no effect on M1-type macrophages and effector cells cultured alone**

**A)** Quantification of %IFN- $\gamma$ <sup>+</sup> T cells. **B)** Quantification of %Ki67<sup>+</sup> T cells. **C)** Quantification of %IFN- $\gamma$ <sup>+</sup> NK cells. **D)** Quantification of %CD107a<sup>+</sup> NK cells. The four groups male effector cell alone, female effector cell alone, male effector cell with M1, female effector cell with M1 are shown sequentially from left to right as mean $\pm$ SEM.

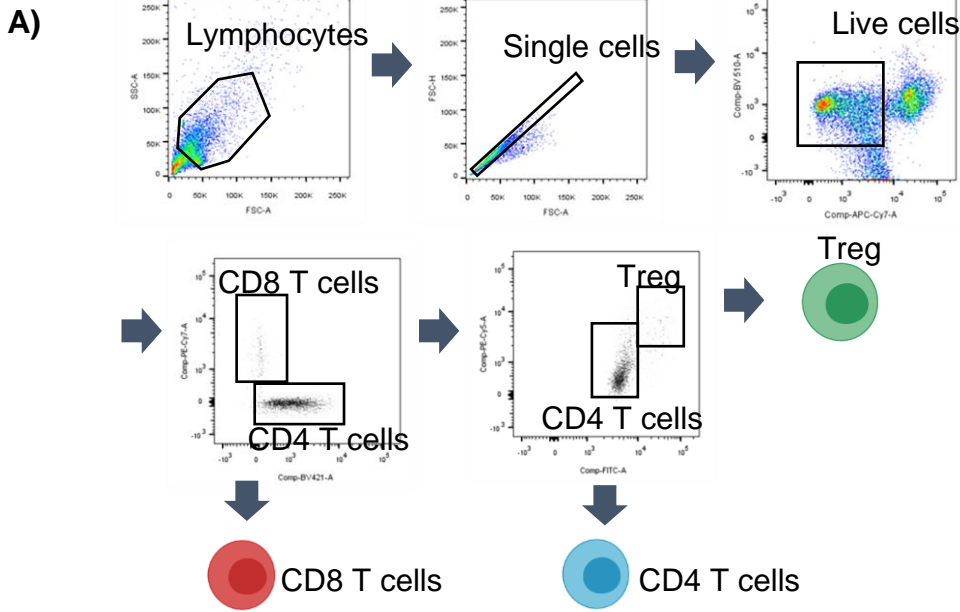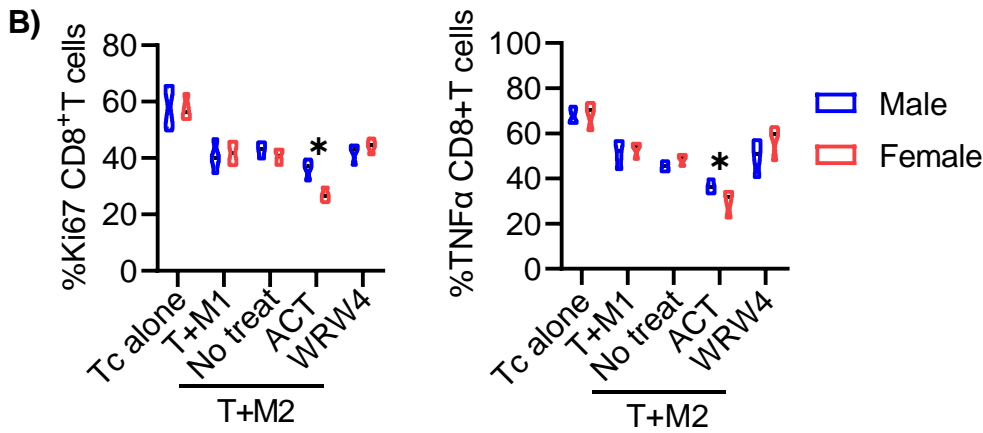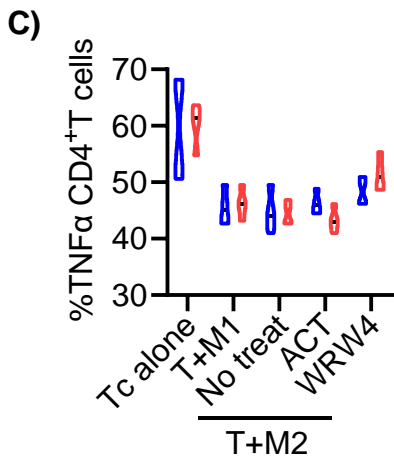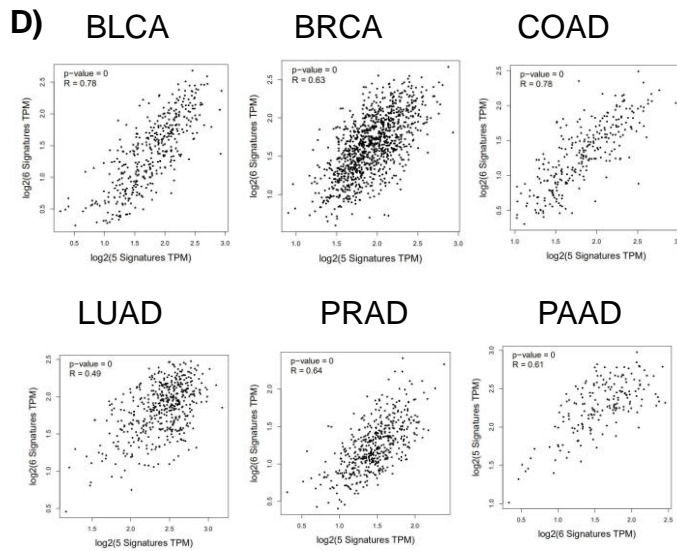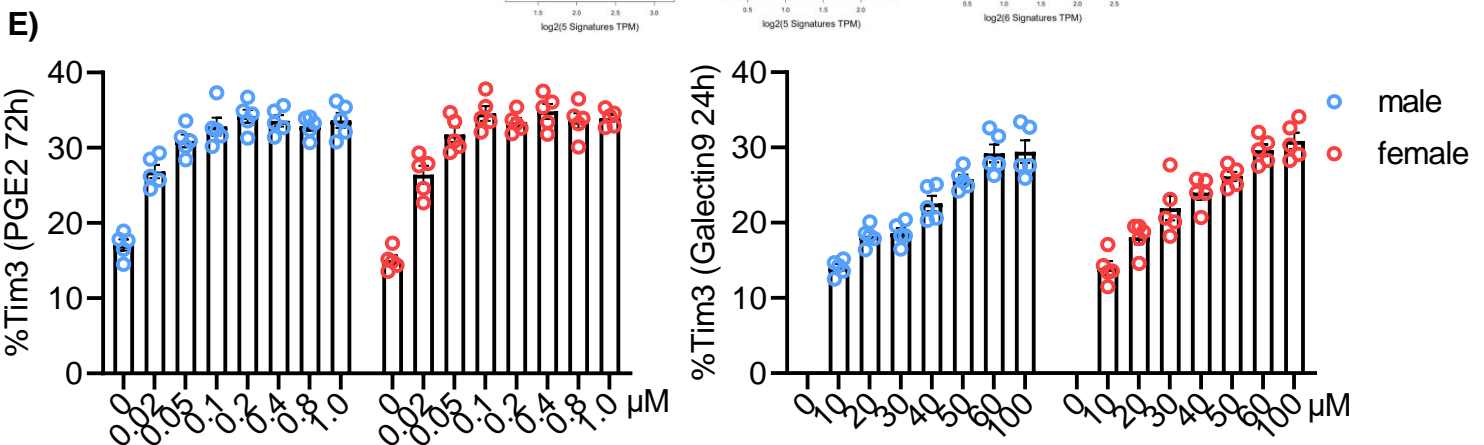

**Supplementary Figure 7. Specific activation of FPR2 in macrophages enhances immunosuppression of T cells**

**A)** Gating strategy for flow cytometry analysis. Purified T cells were gated on size, single cells, and live cells and thereafter for positive expression of CD3/CD4/CD8/CD25/FoxP3. **B)** Quantification of percent Ki67<sup>+</sup> and TNF $\alpha$ <sup>+</sup> CD8 T cells is shown (n=4) and **C)** %TNF $\alpha$ <sup>+</sup> CD4 T cells. **D)** Correlations of M2 macrophage signature and T-cell exhaustion signature from six tumor types extracted from the TCGA datasets. **E)** Quantification of Tim3<sup>+</sup> T cells (n=5) following stimulation by recombinant PGE2 and Galectin9. Data shown as mean $\pm$ SEM.

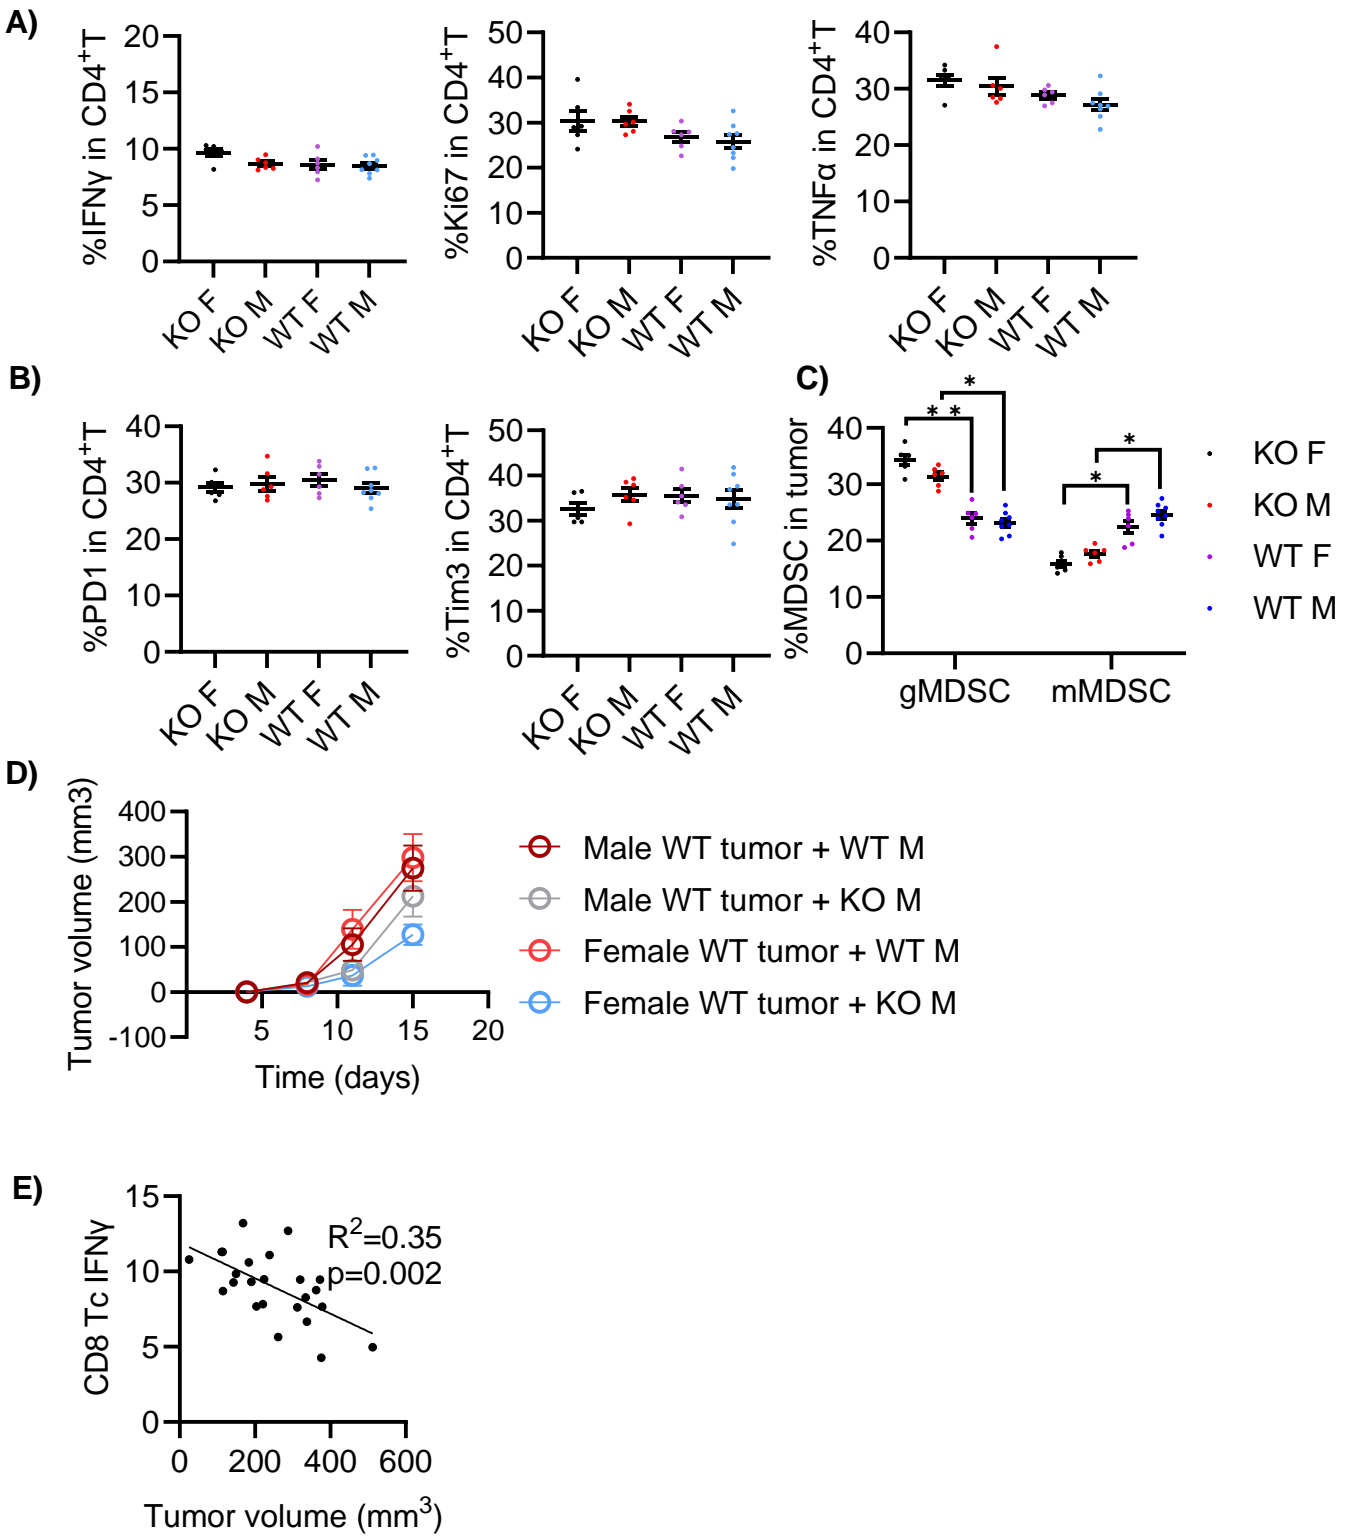

**Supplementary Figure 8. FPR2 regulates myeloid function and suppresses anti-tumor T cell response in the tumor microenvironment *in vivo***

**A)** % IFN $\gamma$ , %Ki67 and, %TNF $\alpha$ , detected in KPC tumor-infiltrating CD4<sup>+</sup> T cells. **B)** % PD1 and %Tim3 detected in KPC tumor-infiltrating CD4<sup>+</sup> T cells. **C)** %gMDSC and %mMDSC in KPC tumor-infiltrating leukocytes.**D)** Tumor growth curves of KPC subcutaneous tumor model with macrophage transferred and **E)** Intratumoral CD8 T cell IFN $\gamma$  production correlation with the tumor growth.



**Table 1. Antibodies and dyes used in the study**

| Human Antibodies                 |             |                  |                |
|----------------------------------|-------------|------------------|----------------|
| Epitope                          | Color       | Clone            | Company        |
| FPR2                             | Primary     | GM1D6            | Invitrogen     |
| Pan-ck                           | Primary     | AE1/AE3 +<br>5D3 | abcam          |
| CD3                              | Primary     | SP7              | abcam          |
| CD45                             | AF488       | H130             | Biolegend      |
| CD11b                            | APC         | ICRF44           | Biolegend      |
| Dead cell marker                 | Near-IR     |                  | Thermofisher   |
| CD14                             | APC/Cy7     | 63D3             | Biolegend      |
| FPRL1/FPR2                       | AF700       | 304405           | RD systems     |
| CD163                            | BV510       | GHI/61           | BD Biosciences |
| CD206                            | PE Cy5      | 551136           | BD Biosciences |
| CD86                             | PE Cy7      | SK1              | Biolegend      |
| HLA-DR                           | PerCP/Cy5.5 | Tü36             | Biolegend      |
| CD3                              | BV510       | HIT3a            | BD Biosciences |
| CD4                              | BV421       | RPA-T4           | BD Biosciences |
| CD8                              | PE-CY7      | SK1              | Biolegend      |
| CD56                             | PE Cy7      | BC96             | Biolegend      |
| CD56                             | APC         | 5.1H11           | Biolegend      |
| IFN $\gamma$                     | BV650       | 4S.B3            | Biolegend      |
| Ki67                             | AF700       | B56              | BD Biosciences |
| CD107a                           | PerCP/Cy5.5 | H4A3             | Biolegend      |
| PD1                              | APC         | eBioJ105         | Invitrogen     |
| Tim3                             | BV605       | F38-2E2          | Biolegend      |
| TNF $\alpha$                     | BV786       | MAB11            | Biolegend      |
| CD16                             | PE          | 3G8              | Biolegend      |
| CD19                             | PECy5       | 1D11             | BioSite        |
| FoxP3                            | AF488       | PCH101           | Invitrogen     |
| CD25                             | PE/Cy5      | BC96             | Biolegend      |
| Fc Block                         |             |                  | BD Biosciences |
| Human Block Antibodies           |             |                  |                |
| Purified anti-human CD366 (TIM3) |             |                  | Biolegend      |
| Purified anti-human CD279 (PD-1) |             |                  | Thermofisher   |
| Murine Antibodies                |             |                  |                |
| FPR2                             | Primary     | Polyclonal       | abcam          |
| F4/80                            | PECy5       | Cl:A3-1          | Biolegend      |
| CD206                            | AF488       | C068C2           | Biolegend      |
| LY6C                             | PE-Cy7      | AL-21            | BD Biosciences |
| LY6G                             | BV711       | 1A8              | BD Biosciences |
| CD11b                            | BV605       | M1/70            | BD Biosciences |
| CD3                              | BV421       | 17A2             | Biolegend      |
| CD4                              | BV785       | RM4-5            | BD Biosciences |

|              |             |          |                |
|--------------|-------------|----------|----------------|
| CD8a         | BV421       | 53-6.7   | BD Biosciences |
| IFN $\gamma$ | PerCP/Cy5.5 | XMG1.2   | BD Biosciences |
| TNF $\alpha$ | PE          | MP6-XT22 | BD Biosciences |
| Ki67         | AF700       | B56      | BD Biosciences |
| PD1          | BV510       | J43      | BD Biosciences |
| Tim3         | APC         | 5D12     | BD Biosciences |
| CD25         | BV650       | PC61     | BD Biosciences |
| CD45         | AF647       | 16A      | BD Biosciences |

**Table 2. Primers used in the study**

| Gene name | Oligo name | Tm°C | Sequence 5'-3'           |
|-----------|------------|------|--------------------------|
| IL1RN     | F          | 58.9 | CTCAGCCAACACTCCTAT       |
|           | R          | 60   | TCCTGGTCTGCAGGTAA        |
| IL2       | F          | 63.8 | AGAACTCAAACCTCTGGAGGAAG  |
|           | R          | 64.7 | GCTGTCTCATCAGCATATTCACAC |
| IL4       | F          | 68.6 | CCGTAACAGACATCTTTGCTGCC  |
|           | R          | 66.7 | GAGTGTCCTTCTCATGGTGGCT   |
| IL10      | F          | 65.9 | ACATCAAGGCGCATGTGAACT    |
|           | R          | 65.5 | TGGCTTTGTAGATGCCTTTCTCTT |
| CD274     | F          | 67.0 | TGCCGACTACAAGCGAATTACTG  |
|           | R          | 68.1 | CTGCTTGTCCAGATGACTTCGG   |
| LGALS9    | F          | 68.8 | TGCAACACGAGGCAGAACG      |
|           | R          | 66.4 | CACAGAGCCATTGACGGAGAT    |
| IL12p40   | F          | 62.3 | CCAAGAACTTGCAGCTGAAG     |
|           | R          | 62.5 | TGGGTCTATTCCGTTGTGTC     |
| TGFB      | F          | 67.4 | TACCTGAACCCGTGTTGCTCTC   |
|           | R          | 69.3 | GTTGCTGAGGTATCGCCAGGAA   |
| PTGS2     | F          | 59.6 | TTCAAATGAGATTGTGGGAAAT   |
|           | R          | 63.7 | AGATCATCTCTGCCTGAGTATCTT |
| GAPDH     | F          | 65.1 | ACCATCATCCCTGCCTCTAC     |
|           | R          | 62.3 | CCTGTTGCTGTAGCCAAAT      |
